# Supplementary material
Source: MDPI journal article supplement (https://www.mdpi.com/1996-1073/15/11/4044)
Supplement: s1 [file s1]

# Experimental investigation of engine performance for 2<sup>nd</sup> generation biodiesel derived from Mg<sub>2</sub>Zr<sub>5</sub>O<sub>12</sub> catalyst

Veena Singh<sup>1\*</sup>, Supriya B. Chavan<sup>2</sup> and Yogesh C. Sharma<sup>3</sup>

\*Correspondence: veena@kth.se; <https://orcid.org/0000-0003-3406-3977>

## Supplementary Material

**Table S1.** Technical specifications of diesel engine, dynamometer, and engine loads.

|                                           |                                                    |
|-------------------------------------------|----------------------------------------------------|
| Model                                     | Kirloskar TV1                                      |
| Engine                                    | IC                                                 |
| Type                                      | Water cooled, diesel                               |
| No. of cylinders                          | 1                                                  |
| No. of strokes                            | 4                                                  |
| Stroke length                             | 110 mm                                             |
| Cylinder diameter                         | 87.5 mm                                            |
| Connecting rod length                     | 234 mm                                             |
| Orifice diameter                          | 20 mm                                              |
| Dynamometer                               | Type eddy current, water cooled, with loading unit |
| Dynamometer model                         | AG-10, SAJ Test Plant Pvt. Ltd                     |
| Water inlet                               | 1.6 bar                                            |
| Dynamometer arm length                    | 185 mm                                             |
| Peak cylinder pressure                    | 77.5 kg/cm <sup>2</sup>                            |
| Fuel injection pump                       | PCB Piezotronics, Model HSM111A22                  |
| Fuel injection standard time              | 23°bTDC                                            |
| Fuel injection pressure                   | 210 bar                                            |
| Fuel flow transmitter                     | DP transmitter, Range 0-500 mm WC                  |
| Air flow transmitter                      | Pressure transmitter, Range (-) 250 mm WC          |
| Power                                     | 3.5 kW                                             |
| Speed                                     | 1500 rpm                                           |
| Brake mean effective pressure at 1500 rpm | 6.35 kg/cm <sup>2</sup>                            |
| Power rating:                             |                                                    |
| Continuous                                | 7/1500 hp/rpm                                      |
| Intermittent                              | 7.7/1500 hp/rpm                                    |
| CR ratio                                  | 18:1                                               |

|                             |                                                      |
|-----------------------------|------------------------------------------------------|
| Overall dimension           | 617L × 504W × 877H                                   |
| Weight                      | 160 kg                                               |
| Load cell model             | Apex, Model AX-155 and constant speed                |
| Capacity                    | 0 – 50 kg                                            |
| Operating temperature range | -20 °C to +70 °C                                     |
| Data acquisition device     | NI USB-6210, 16 bit                                  |
| Software                    | 'EnginesoftLV' Engine performance analysers software |

**Table S2.** Technical specifications of exhaust gas analyser.

|                                |                                                                                                                 |
|--------------------------------|-----------------------------------------------------------------------------------------------------------------|
| Gases Measured                 | CO, CO <sub>2</sub> , NO <sub>x</sub> , UHC                                                                     |
| Exhaust gas analyser           | PEA205, INDUS <i>Scientific</i>                                                                                 |
| Smoke meter                    | Indus Scientific, Range – 0 to 100% HSU                                                                         |
| Principle                      | Non-Dispersive Infrared Sensors for CO, CO <sub>2</sub> , HC<br>and Electrochemical sensors for NO <sub>x</sub> |
| Gas Flow Rate                  | 500 – 1000 ml per minute                                                                                        |
| Operating temperature          | 5 to 45 °C                                                                                                      |
| Pressure                       | 813 to 1060 mbar                                                                                                |
| Humidity                       | 0-90%                                                                                                           |
| CO emission range              | 0-15.00%<br>0-4000ppm                                                                                           |
| CO <sub>2</sub> emission range | 0-20.00%                                                                                                        |
| NO <sub>x</sub> range          | 0-5000 ppm                                                                                                      |
| UHC range                      | 0-30000 ppm                                                                                                     |
